# Supplementary material
Source: PubMed Central journal article supplement (PMC4795021)
Supplement: rspb20152334supp1.pdf [file rspb20152334supp1.pdf]

1 **Supplemental Material:**

2 **Diabolical survival in Death Valley: recent pupfish**  
3 **colonization, gene flow, and genetic assimilation in**  
4 **the smallest species range on earth**

5 CHRISTOPHER H. MARTIN<sup>1</sup>, JACOB E. CRAWFORD<sup>2,3,4</sup>, BRUCE J. TURNER<sup>5</sup>, LEE H.  
6 SIMONS<sup>6</sup>

7  
8 *<sup>1</sup>Department of Biology, University of North Carolina at Chapel Hill, NC, USA*

9 *<sup>2</sup>Department of Integrative Biology, University of California, Berkeley, CA, USA*

10 *<sup>3</sup>Center for Theoretical Evolutionary Genomics, University of California, Berkeley, CA, USA*

11 *<sup>4</sup>Google, Inc., 1600 Amphitheatre Parkway, Mountain View, CA, USA*

12 *<sup>5</sup>Department of Biological Sciences, Virginia Tech, VA, USA*

13 *<sup>6</sup>Southern Nevada Fish and Wildlife Office, Las Vegas, NV, USA*

14

15

16

17

18

19

20

21

## 22 **Supplemental Methods**

### 23 *Sample collection*

24 *C. diabolis* is one of the most endangered fish on earth and thus collecting tissue from live animals  
25 was impossible at the time of this study. From 2007 – 2012, all dead fish encountered in Devils  
26 Hole ( $n = 20$ ) were collected by National Park Service staff after ~12 – 48 hours of putrefaction  
27 in the 32° C water (Appendix S1). Specimens were sometimes fixed in formalin (Davidson's  
28 solution) and stored in 70% ethanol at room temperature. Highly-degraded DNA showing a large  
29 fragment size distribution was successfully extracted from 13 samples with Qiagen blood and  
30 tissue kits. Additional samples from the School Spring refuge population collected in 1989 ( $n = 3$ )  
31 were also used. All other Death Valley samples came from archived specimens used for previous  
32 studies [1,2]. Outgroup *Cyprinodon* samples were previously collected in the wild [3] or, if extinct  
33 in the wild ( $n = 6$ ), provided by the American Killifish Association *Cyprinodon* species  
34 maintenance group from existing captive populations (Appendix S1). *Cyprinodon* species were  
35 sampled from all major extant lineages, including the earliest split within the clade between the  
36 *artifrons*+Chichancanab endemic species flock and all other extant species [3,4].

37

### 38 *Genomic library preparation and bioinformatics*

39 Double-digest RADseq libraries were prepared following Peterson et al. [5] with minor  
40 modifications as described in Martin et al. [6]. SbfI and NlaIII restriction enzymes were used for  
41 digestion. The *Cyprinodon variegatus* genome assembly (v. 1.0, 1035 Mb, 81x coverage) used for  
42 aligning reads is relatively high-quality, containing 9,258 scaffolds with an N50 scaffold size of  
43 835 kb (NCBI: Wesley Warren, "Whole genome assembly resources for aquatic models of human  
44 disease", Grant ID 8 R24 OD011198-02, National Center for Research Resources). Empirical

45 fragment size selection windows ranged from 300-400 bp using a Blue Pippin Prep (Sage Science).  
46 Twelve cycles were used for amplification across two independent reactions per library to limit  
47 PCR error. 145 individuals with 4-8 bp molecular barcodes (described in [7]) were sequenced on  
48 one and a half Illumina 2000 HiSeq lanes at the Vincent J. Coates Genomic Sequencing Center at  
49 UC Berkeley (one lane was pooled with 47 individuals from another study). Respectively, 43.6  
50 and 154.7 million 95-bp and 120-bp single-end raw reads were sequenced with 67% and 76%  
51 recovery of high-quality, barcoded reads with an intact restriction site using default settings in  
52 `sort_reads` (Stacks v. 1.20; [8]). Read quality did not substantially decline along each read, ranging  
53 from a median Phred quality score of 42 (0.99994% accuracy) to 34 (0.9996% accuracy) from read  
54 positions 15 to 100 in both Illumina lanes, starting around position 55.

55 Raw reads were de-multiplexed and sorted for quality using default settings in  
56 `process_radtags` in the Stacks pipeline [9] and aligned to the *Cyprinodon variegatus* draft genome  
57 (v. 1.0) using bowtie 2 (v. 2.2.3; [10]) with very high sensitivity settings and end-to-end alignment.  
58 Aligned reads were merged into homologous loci by their genomic position, not sequence identity  
59 (`cstacks -g`). SNPs were called using a likelihood model across individuals. We then used `rxstacks`  
60 to exclude problematic loci with a log-likelihood less than -100 or if more than 25% of individuals  
61 contained multiple loci matching a single catalog locus (`conf_limit = 0.25`) or any non-biological  
62 haplotypes (`--prune_haplo`). Loci with a minimum of 8 sequenced reads were exported from the  
63 Stacks pipeline in .plink format (`-m 8 --plink`). We used PLINK [11] to exclude low-coverage  
64 individuals genotyped at less than 5% of total loci over all populations/species and retained only  
65 those loci present in >50% of all high-coverage individuals ( $n = 56$ ) for downstream analyses.

66

67 ***Population genetic structure and introgression analyses***

68 Principal components of genetic variance were calculated using probabilistic PCA in the  
69 `pcaMethods` package in R [12]. Bayesian clustering analyses with STRUCTURE sampled one  
70 SNP per locus (4,679 SNPs) and were aggregated using CLUMPP [13] and STRUCTURE  
71 Harvester [14] from 10 independent runs of 50,000 generations each after discarding the first  
72 50,000 generations as burn-in (Table S4). Confidence in estimates of ancestry proportions was  
73 assessed by comparing estimates across independent runs of STRUCTURE.

74 Inference of introgression was made using three complementary approaches. First, formal  
75 tests of introgression used D-statistics, also known as ABBA/BABA tests [15–17], to determine if  
76 any populations shared more residual alleles than expected under a tree-like model of branching.  
77 D-statistics were calculated with a custom script after thinning to one informative site (i.e. ABBA  
78 or BABA) per locus. Z-scores were calculated based on 500 bootstrap datasets sampled from the  
79 thinned dataset. Second, estimated ancestry proportions of each individual in STRUCTURE were  
80 used to complement these formal tests. Third, Treemix (v. 1.12; [18]) was used to visualize  
81 variance-covariance relationships in allele frequencies among Death Valley populations. Four  
82 migration events were fit to a maximum likelihood population tree to estimate which populations  
83 showed the strongest evidence for introgression.

84

### 85 *Phylogenetic analyses and time-calibration*

86 We constructed a new catalogue of homologous loci for taxa used in phylogenetic analyses by  
87 merging loci by genomic position and extracting loci present in at least 4 taxa following  
88 recommendations for clustering thresholds in phylogenetic analyses of RADseq data [19,20]. A  
89 fasta file was exported from Stacks and sorted by locus with a custom perl script (provided as a  
90 supplemental file in the supplemental material) and then concatenated into a nexus file using

91 Geneious (v. 7.1.7; [21]). A single haplotype was sampled from one high-coverage individual per  
92 population. We used a coalescent process with constant population size for our tree prior.  
93 Nucleotide substitution rates were modeled by the general time-reversible model (GTR) plus  
94 gamma-distributed rate variation across loci. We used an uncorrelated lognormal model or a  
95 random local model for the molecular clock. Four independent MCMC chains were run on the  
96 CIPRES cluster [22] using BEAST (v. 1.8.1; [23]), totaling 186 million generations after  
97 discarding burn-in. We confirmed the convergence of all four runs in  $\leq 4$  million generations using  
98 Tracer (v. 1.6) and all parameters exceeded an effective sample size of 153. We also explored the  
99 effects of additional phylogenetic models on parameter estimation (discussed below).

100         We calibrated our phylogeny (16,567 concatenated loci, 38,069 informative sites) with the  
101 only well-defined recent geological event known for *Cyprinodon*: the  $8,000 \pm 200$  year age of  
102 Laguna Chichancanab [24,25], an endorheic basin which contains an endemic species flock of  
103 *Cyprinodon* pupfishes (Fig. 2d; Humphries & Miller 1981). It is unlikely that the Chichancanab  
104 species flock diverged before the basin formed because these species cannot tolerate fish predators  
105 found in all neighboring surface waters (at least 3 Chichancanab pupfish species are now extinct  
106 due to invasive fishes [3,27]); therefore, our calibration places a lower bound on the spontaneous  
107 mutation rate [28]. We placed a normal prior on the divergence time between *C. artifrons* (the  
108 most closely related species from the Yucatan coast) and the stem age of the Chichancanab lineage  
109 with a mean of 8,000 years and standard deviation of 100 years. This age and associated error  
110 (95% confidence interval:  $\pm 200$  years) were based on multiple core samples and multiple lines of  
111 evidence, including stable isotope data and shifts from terrestrial to aquatic invertebrate  
112 communities [24,25]. No other accurate fossil or geological age estimates for *Cyprinodon* exist  
113 (reviewed in Martin & Wainwright 2011: supplement). There is a single posterior half of one fossil

114 assigned to *Cyprinodon* which was collected in Death Valley; however, no synapomorphies were  
115 used for this designation and the rock was ascribed to Late Pliocene strata based only on “the  
116 presence of a *Cyprinodon*” (p. 316, Miller 1945). Furthermore, the vertebral count of this fossil  
117 lies outside the extant range of Cyprinodontinae (T. Echelle, pers. comm.).

118

### 119 *Estimation of the mutation rate in pupfishes*

120 Estimating mutation rates across animal taxa, and even within humans, remains a difficult and  
121 controversial problem [29,30]. For example, phylogenetic estimates of substitution rates calibrated  
122 with ancient fossil or geographic vicariance events appear to be at least an order of magnitude  
123 slower than mutation rates observed at more recent timescales (<100,000 years) based on high-  
124 coverage sequencing of pedigrees, comparisons between ancient and modern DNA samples, and  
125 mutation-accumulation lines [31–35]. Estimates of mutation rates in fishes are sparse, particularly  
126 for nuclear DNA. One study found that substitution rates at four-fold degenerate sites were twice  
127 as high between two pufferfish species ( $1.46e^{-8}$  per site per year) as between humans and mouse  
128 for unknown reasons [36]. One of the key studies documenting that substitution rates are dependent  
129 on the time-scale of priors used for calibration found that mtDNA substitution rates are an order  
130 of magnitude faster in the past 200 kya for riverine fishes using internal calibrations based on the  
131 age of different river basins [34]. Overall, one recommendation emerging from this controversy is  
132 to calibrate recent phylogenies with internal calibrations on a similar timescale to the focal group,  
133 rather than distantly related outgroups with a better fossil record [34,37]. We have followed this  
134 approach here. However, additional uncertainty is introduced by the largely unknown variation in  
135 mutation rates across taxa and the biased genomic sampling provided by double-digest RADseq  
136 library preparation.

137 We explored several strategies to determine whether our methods or dataset may have  
138 biased our mutation rate estimate. First, we explored additional phylogenetic models (random local  
139 clock), more stringent filtering of RAD loci ( $m = 20$  reads instead of 8 to reduce sequencing error),  
140 and taxon subsets (only the Chichancanab species and closest outgroup) to determine how these  
141 variables affected our estimate of the mutation rate (Table S2). We discarded burn-in and checked  
142 for stationarity in our BEAST analyses as described previously.

143 Second, we also completely reran our pipeline from raw reads trimmed to 53 bp to remove  
144 later positions with decreased read qualities, which declined from median Phred quality scores of  
145 42 (0.99994% accuracy) to 34 (0.9996% accuracy) from read positions 15 to 100, starting around  
146 position 55. We used this empirical evaluation of declining read qualities in FastQC (Babraham  
147 Bioinformatics) to guide our trimming strategy. We re-aligned trimmed reads and used the latest  
148 version of Stacks (v. 1.34: [9]) to assemble mapped reads into homologous loci and call SNPs as  
149 described previously. We then estimated a new time-calibrated phylogeny from a concatenated set  
150 of 4,159 53-bp loci genotyped in more than 50% of individuals to explore how this trimming  
151 procedure and new pipeline affected our estimate of the mutation rate (Table S2, Fig. S4) and a  
152 new principal component analysis of genetic variance to explore how trimming affected population  
153 structure (Fig. S5). We attempted to redo our *dadi* analysis; however, trimming removed nearly  
154 50% of our data (including all true positive SNP calls in this region) and our *dadi* model did not  
155 converge due to insufficient data to constrain the prior.

156 There are many reasons to expect RADseq data to be a biased under- or over-representation  
157 of genomic diversity due to selective targeting of GC-rich loci, PCR amplification bias, allele  
158 dropout at polymorphic sites [40], and other unknown biases [41,42]. For example, our infrequent-  
159 cutting restriction enzyme SbfI targets extremely GC-rich sites (6 out of 8 sites in the recognition

160 sequence are GC). Although restriction sites are removed for downstream analyses, this means  
161 that GC-rich genomic regions are targeted (such as protein-coding regions) which may result in  
162 the overestimation of the genome-wide mutation rate due to mutation rates at CpG sites [43,44].  
163 Second, PCR amplification during library preparation may preferentially amplify GC-rich  
164 fragments and any errors introduced will be amplified in each cycle, resulting in genotyping errors  
165 despite seemingly sufficient read depths [42]. Third, filtering for loci shared across taxa biases the  
166 mutation rate due to allelic dropout: homologous loci shared by more taxa are more likely to be  
167 evolving more slowly and retain a shared restriction site needed for detection. Thus, more stringent  
168 filtering for shared loci will bias estimated mutation rates downward while more lenient filtering  
169 will bias mutation rates upward and increase the amount of sequencing error and spurious loci.  
170 This has now been demonstrated in simulation studies [41], empirically [45], and we observed this  
171 pattern in our own dataset (unpublished data). Finally, allelic dropout results in the underestimation  
172 of genetic diversity due to incorrectly calling all polymorphic restriction sites as homozygous [40].  
173 Genetic diversity estimates in Table S1 may be underestimated, but this bias is not expected to  
174 affect estimates of genetic differentiation or introgression among species [40]. We pooled two  
175 independent PCR reactions for each library and compared different levels of read depths and taxon  
176 filtering in our analyses to examine the effects of these biases. However, the biased genomic  
177 sampling of RADseq is inescapable.

178         Nonetheless, although our dataset may be biased, Bayesian posterior estimates of  
179 divergence time are extremely sensitive to calibration priors, rather than the observed  
180 heterozygosity within a dataset [46]. Thus, our estimate of the age of *diabolis* depends mainly on  
181 the accuracy of our calibration choice, not the underlying bias in our dataset, because any  
182 mutational bias present is rescaled to an external timescale and we used this same dataset for later



183 demographic analysis. For example, if we time-calibrate our phylogeny using a fixed molecular  
184 clock with the human mutation rate of  $0.5e^{-9}$  mutations/site/year, this places the age of the Laguna  
185 Chichancanab species flock at 4.9 million years, vastly greater than the 8,000-year geological age  
186 of this basin [24,25]. This strongly suggests that either pupfish mutation rates greatly exceed  
187 human rates or our RADseq dataset is a biased sample of heterozygosity.

188

### 189 *Demographic modeling with dadi*

190 We used *dadi* to fit a simple demographic model including divergence time, migration between  
191 populations, and effective population sizes before and after the split to the observed two-  
192 dimensional site frequency spectrum between these species (Fig. 3, Table S2). We used a  
193 generation time of 9 months for *diabolis* based on the observed peak reproductive periods in March  
194 and October and annual lifecycle of 1 year [47,48], which captures the age at which these fish are  
195 likely to contribute most to the next generation. To increase our sample sizes, we pooled all  
196 *mionectes*, *amargosae/shoshone/nevadensis*, and *salinus/milleri* populations into three groups  
197 based on their genetic clustering (Fig. 2a-b). We polarized (unfolded) the allele frequency  
198 spectrum using *salinus/milleri*. We then collapsed the site frequency spectrum to eight  
199 chromosomes to maximize the number of sites and sampled one SNP per locus to reduce the effects  
200 of linkage disequilibrium in our dataset. We bootstrapped 500 samples from this dataset to obtain  
201 empirical 95% confidence intervals for demographic parameters in our model.

202

203

204

205

207 **References**

- 208 1. Duvernell, D. D. & Turner, B. J. 1998 Variation and Divergence of Death Valley Pupfish  
209 Populations at Retrotransposon-Defined Loci. , 363–371.
- 210 2. Echelle, A. & Dowling, T. 1992 Mitochondrial DNA variation and evolution of the Death  
211 Valley pupfishes (Cyprinodon, Cyprinodontidae). *Evolution (N. Y.)* **46**, 193–206.
- 212 3. Martin, C. H. & Wainwright, P. C. 2011 Trophic novelty is linked to exceptional rates of  
213 morphological diversification in two adaptive radiations of *Cyprinodon* pupfish. *Evolution*  
214 **65**, 2197–212. (doi:10.1111/j.1558-5646.2011.01294.x)
- 215 4. Echelle, A. a., Carson, E. W., Echelle, A. F., Van Den Bussche, R. a., Dowling, T. E. &  
216 Meyer, A. 2005 Historical Biogeography of the New-World Pupfish Genus *Cyprinodon*  
217 (Teleostei: Cyprinodontidae). *Copeia* **2005**, 320–339. (doi:10.1643/CG-03-093R3)
- 218 5. Peterson, B. K., Weber, J. N., Kay, E. H., Fisher, H. S. & Hoekstra, H. E. 2012 Double  
219 digest RADseq: an inexpensive method for de novo SNP discovery and genotyping in  
220 model and non-model species. *PLoS One* **7**, e37135. (doi:10.1371/journal.pone.0037135)
- 221 6. Martin, C. H., Cutler, J. S., Friel, J. P., Denning, T., Coop, G. & Wainwright, P. C. 2015  
222 Complex histories of repeated colonization and hybridization cast doubt on the clearest  
223 examples of sympatric speciation in the wild. *Evolution (N. Y.)*.
- 224 7. Martin, C. H. & Feinstein, L. C. 2014 Novel trophic niches drive variable progress  
225 towards ecological speciation within an adaptive radiation of pupfishes. *Mol. Ecol.* **23**,  
226 1846–62. (doi:10.1111/mec.12658)
- 227 8. Catchen, J., Hohenlohe, P. A., Bassham, S., Amores, A. & Cresko, W. A. 2013 Stacks: an  
228 analysis tool set for population genomics. *Mol. Ecol.* **22**, 3124–40.  
229 (doi:10.1111/mec.12354)
- 230 9. Catchen, J., Hohenlohe, P. a, Bassham, S., Amores, A. & Cresko, W. a 2013 Stacks: an  
231 analysis tool set for population genomics. *Mol. Ecol.* **22**, 3124–40.  
232 (doi:10.1111/mec.12354)
- 233 10. Langmead, B. & Salzberg, S. 2012 Fast gapped-read alignment with Bowtie 2. *Nat.*  
234 *Methods* **9**, 357–359.
- 235 11. Purcell, S., Neale, B. & Todd-Brown, K. 2007 PLINK: a tool set for whole-genome  
236 association and population-based linkage analyses. *Am. J. Hum. Genet.* **81**, 559–575.

- 237 12. Stacklies, W., Redestig, H., Scholz, M., Walther, D. & Selbig, J. 2007 pcaMethods--a  
238 bioconductor package providing PCA methods for incomplete data. *Bioinformatics* **23**,  
239 1164–7. (doi:10.1093/bioinformatics/btm069)
- 240 13. Jakobsson, M. & Rosenberg, N. a 2007 CLUMPP: a cluster matching and permutation  
241 program for dealing with label switching and multimodality in analysis of population  
242 structure. *Bioinformatics* **23**, 1801–6. (doi:10.1093/bioinformatics/btm233)
- 243 14. Earl, D. A. 2012 STRUCTURE HARVESTER: a website and program for visualizing  
244 STRUCTURE output and implementing the Evanno method. *Conserv. Genet. Resour.* **4**,  
245 359–361.
- 246 15. Heliconius, T. & Consortium, G. 2012 Butterfly genome reveals promiscuous exchange of  
247 mimicry adaptations among species. *Nature* **487**, 94–8. (doi:10.1038/nature11041)
- 248 16. Green, R. E. et al. 2010 A draft sequence of the Neandertal genome. *Science* **328**, 710–22.  
249 (doi:10.1126/science.1188021)
- 250 17. Durand, E. Y., Patterson, N., Reich, D. & Slatkin, M. 2011 Testing for ancient admixture  
251 between closely related populations. *Mol. Biol. Evol.* **28**, 2239–52.  
252 (doi:10.1093/molbev/msr048)
- 253 18. Pickrell, J. K. & Pritchard, J. K. 2012 Inference of Population Splits and Mixtures from  
254 Genome-Wide Allele Frequency Data. *PLoS Genet.* **8**, e1002967.  
255 (doi:10.1371/journal.pgen.1002967)
- 256 19. Eaton, D. a. R. 2013 PyRAD: assembly of de novo RADseq loci for phylogenetic  
257 analyses. (doi:10.1101/001081)
- 258 20. Rubin, B. E. R., Ree, R. H. & Moreau, C. S. 2012 Inferring Phylogenies from RAD  
259 Sequence Data. *PLoS One* **7**, e33394. (doi:10.1371/journal.pone.0033394)
- 260 21. Kearse, M. et al. 2012 Geneious Basic: an integrated and extendable desktop software  
261 platform for the organization and analysis of sequence data. *Bioinformatics* **28**, 1647–9.  
262 (doi:10.1093/bioinformatics/bts199)
- 263 22. Miller, M. A., Pfeiffer, W. & Schwartz, T. 2010 Creating the CIPRES Science Gateway  
264 for inference of large phylogenetic trees. *2010 Gatew. Comput. Environ. Work.* , 1–8.  
265 (doi:10.1109/GCE.2010.5676129)
- 266 23. Drummond, A. J. & Rambaut, A. 2007 BEAST : Bayesian evolutionary analysis by  
267 sampling trees. *BMC Evol. Biol.* **8**, 1–8. (doi:10.1186/1471-2148-7-214)
- 268 24. Covich, A. & Stuiver, M. 1974 Changes in the oxygen 18 as a measure of long-term  
269 fluctuations in tropical lake levels and molluscan populations. *Limnol. Oceanogr.* **19**,  
270 682–691.

- 271 25. Hodell, D., Curtis, J. & Brenner, M. 1995 Possible role of climate in the collapse of  
272 Classic Maya civilization. *Nature* **375**, 391–394.
- 273 26. Humphries, J. & Miller, R. R. 1981 A remarkable species flock of pupfishes, genus  
274 *Cyprinodon*, from Yucatan, Mexico. *Copeia* **1981**, 52–64.
- 275 27. Strecker, U. 2006 The impact of invasive fish on an endemic *Cyprinodon* species flock  
276 (Teleostei) from Laguna Chichancanab, Yucatan, Mexico. *Ecol. Freshw. Fish* **15**, 408–  
277 418. (doi:10.1111/j.1600-0633.2006.00159.x)
- 278 28. Lanfear, R., Kokko, H. & Eyre-Walker, A. 2014 Population size and the rate of evolution.  
279 *Trends Ecol. Evol.* **29**, 33–41. (doi:10.1016/j.tree.2013.09.009)
- 280 29. Scally, A. & Durbin, R. 2012 Revising the human mutation rate: implications for  
281 understanding human evolution. *Nat. Rev. Genet.* **13**, 824–824. (doi:10.1038/nrg3353)
- 282 30. Ho, S. Y. W., Phillips, M. J., Cooper, A. & Drummond, A. J. 2005 Time dependency of  
283 molecular rate estimates and systematic overestimation of recent divergence times. *Mol.*  
284 *Biol. Evol.* **22**, 1561–8. (doi:10.1093/molbev/msi145)
- 285 31. Santos, C., Montiel, R., Sierra, B., Bettencourt, C., Fernandez, E., Alvarez, L., Lima, M.,  
286 Abade, A. & Aluja, M. P. 2005 Understanding differences between phylogenetic and  
287 pedigree-derived mtDNA mutation rate: A model using families from the Azores Islands  
288 (Portugal). *Mol. Biol. Evol.* **22**, 1490–1505. (doi:10.1093/molbev/msi141)
- 289 32. Millar, C. D., Dodd, A., Anderson, J., Gibb, G. C., Ritchie, P. a, Baroni, C., Woodhams,  
290 M. D., Hendy, M. D. & Lambert, D. M. 2008 Mutation and evolutionary rates in adélie  
291 penguins from the antarctic. *PLoS Genet.* **4**, e1000209.  
292 (doi:10.1371/journal.pgen.1000209)
- 293 33. Subramanian, S., Denver, D. R., Millar, C. D., Heupink, T., Aschrafi, A., Emslie, S. D.,  
294 Baroni, C. & Lambert, D. M. 2009 High mitogenomic evolutionary rates and time  
295 dependency. *Trends Genet.* **25**, 482–6. (doi:10.1016/j.tig.2009.09.005)
- 296 34. BurrIDGE, C. P., Craw, D., Fletcher, D. & Waters, J. M. 2008 Geological dates and  
297 molecular rates: fish DNA sheds light on time dependency. *Mol. Biol. Evol.* **25**, 624–33.  
298 (doi:10.1093/molbev/msm271)
- 299 35. Ho, S. Y. W., Saarma, U., Barnett, R., Haile, J. & Shapiro, B. 2008 The effect of  
300 inappropriate calibration: three case studies in molecular ecology. *PLoS One* **3**, e1615.  
301 (doi:10.1371/journal.pone.0001615)
- 302 36. Jaillon, O. et al. 2004 Genome duplication in the teleost fish *Tetraodon nigroviridis*  
303 reveals the early vertebrate proto-karyotype. *Nature* **431**, 946–957.  
304 (doi:10.1038/nature03025)

- 305 37. Ho, S. Y. W. 2007 Calibrating molecular estimates of substitution rates and divergence  
306 times in birds. *J. Avian Biol.* **38**, 409–414. (doi:10.1111/j.2007.0908-8857.04168.x)
- 307 38. Brix, K. V & Grosell, M. 2012 Comparative characterization of Na<sup>+</sup> transport in  
308 *Cyprinodon variegatus variegatus* and *Cyprinodon variegatus hubbsi*: a model species  
309 complex for studying teleost invasion of freshwater. *J. Exp. Biol.* **215**, 1199–209.  
310 (doi:10.1242/jeb.067496)
- 311 39. Leffler, E. M., Bullaughey, K., Matute, D. R., Meyer, W. K., Ségurel, L., Venkat, A.,  
312 Andolfatto, P. & Przeworski, M. 2012 Revisiting an old riddle: what determines genetic  
313 diversity levels within species? *PLoS Biol.* **10**, e1001388.  
314 (doi:10.1371/journal.pbio.1001388)
- 315 40. Arnold, B., Corbett-Detig, R. B., Hartl, D. & Bomblies, K. 2013 RADseq underestimates  
316 diversity and introduces genealogical biases due to nonrandom haplotype sampling. *Mol.*  
317 *Ecol.* **22**, 3179–3190. (doi:10.1111/mec.12276)
- 318 41. Huang, H. & Knowles, L. L. 2014 Unforeseen Consequences of Excluding Missing Data  
319 from Next-Generation Sequences: Simulation Study of RAD Sequences. *Syst. Biol.* **0**, 1–9.  
320 (doi:10.1093/sysbio/syu046)
- 321 42. Puritz, J. B., Matz, M. V, Toonen, R. J., Weber, J. N., Bolnick, D. I. & Bird, C. E. 2014  
322 Demystifying the RAD fad. *Mol. Ecol.* **23**, 5937–42. (doi:10.1111/mec.12965)
- 323 43. Guryev, V., Koudijs, M. J., Berezikov, E., Johnson, S. L., Plasterk, R. H. a, Eeden, J. M.  
324 Van, Cuppen, E. & Eeden, F. J. M. Van 2006 Genetic variation in the zebrafish Genetic  
325 variation in the zebrafish. , 491–497. (doi:10.1101/gr.4791006)
- 326 44. Nachman, M. W. & Crowell, S. L. 2000 Estimate of the mutation rate per nucleotide in  
327 humans. *Genetics*
- 328 45. Leache, a. D., Chavez, a. S., Jones, L. N., Grummer, J. a., Gottscho, a. D. & Linkem, C.  
329 W. 2015 Phylogenomics of Phrynosomatid Lizards: Conflicting Signals from Sequence  
330 Capture Versus Restriction Site Associated DNA Sequencing. *Genome Biol. Evol.* **7**, 706–  
331 719. (doi:10.1093/gbe/evv026)
- 332 46. Warnock, R. C. M., Parham, J. F., Joyce, W. G., Lyson, T. R. & Donoghue, P. C. J. 2014  
333 Calibration uncertainty in molecular dating analyses : there is no substitute for the prior  
334 evaluation of time priors.
- 335 47. Deacon, J. E., Taylor, F. R., Pedretti, J. W. & Pedretti, W. 1995 Egg viability and ecology  
336 of Devils Hole pupfish : Insights from captive propagation. *Southwest. Nat.* **40**, 216–223.
- 337 48. Riggs, A. & Deacon, J. 2002 Connectivity in desert aquatic ecosystems: The Devils Hole  
338 story. *Spring-fed Wetl. important Sci. Cult. Resour. Intermt. Reg.* **11**.

- 339 49. Evanno, G., Regnaut, S. & Goudet, J. 2005 Detecting the number of clusters of  
340 individuals using the software STRUCTURE: a simulation study. *Mol. Ecol.* **14**, 2611–20.  
341 (doi:10.1111/j.1365-294X.2005.02553.x)
- 342 50. Martin, A. P., Echelle, A. a., Zegers, G., Baker, S. & Keeler-Foster, C. L. 2011 Dramatic  
343 shifts in the gene pool of a managed population of an endangered species may be  
344 exacerbated by high genetic load. *Conserv. Genet.* **13**, 349–358. (doi:10.1007/s10592-  
345 011-0289-7)

346

347

348

349

350

351

352

353

354

355

356

357

358

359

360

361

362

363

364

365 **Table S1.** Genetic diversity ( $\pi$ ), private alleles, total nucleotide sites examined, and percentage of  
 366 polymorphic sites in Death Valley pupfishes and additional pupfish outgroups for comparison (EW  
 367 = extinct in the wild based on IUCN designation or unpublished observations). Number of  
 368 individuals sequenced in each population is indicated (Appendix S1).

| species/subspecies                      | location                      | genetic diversity | private alleles | total sites | %polymorphic |
|-----------------------------------------|-------------------------------|-------------------|-----------------|-------------|--------------|
| <i>Cyprinodon diabolis</i> (n = 4)      | Devils Hole                   | 0.0009            | 1019            | 1017310     | 0.0938       |
| <i>C. nevadensis mionectes</i> (n = 8)  | Point-of-Rocks                | 0.0023            | 1572            | 1229973     | 0.2348       |
| <i>C. nevadensis mionectes</i> (n = 1)  | Big Spring                    | 0.0006            | 272             | 403729      | 0.0577       |
| <i>C. nevadensis pectoralis</i> (n = 7) | Indian Spring                 | 0.0001            | 21              | 141445      | 0.0099       |
| <i>C. nevadensis amargosae</i> (n = 7)  | Amargosa River                | 0.002             | 1008            | 1261354     | 0.1954       |
| <i>C. nevadensis shoshone</i> (n = 5)   | Shoshone Spring               | 0.0013            | 539             | 874517      | 0.1337       |
| <i>C. nevadensis nevadensis</i> (n = 7) | Saratoga Spring               | 0.0021            | 1360            | 1314878     | 0.2135       |
| <i>C. salinus salinus</i> (n = 2)       | Salt Creek                    | 0.0009            | 1244            | 1184303     | 0.0888       |
| <i>C. salinus milleri</i> (n = 1)       | Cottonball Marsh              | 0.0004            | 264             | 367191      | 0.0400       |
| All Death Valley species                | Death Valley                  | 0.0036            | 10224           | 1140524     | 0.7117       |
| <i>C. artifrons</i> (n = 1)             | coastal Cancun, Mexico        | 0.0034            | 3212            | 1185394     | 0.3354       |
| <i>C. variegatus</i> (n = 1)            | coastal San Salvador, Bahamas | 0.0039            | 9900            | 1311769     | 0.3862       |
| <i>C. alvarezi</i> (n = 1)              | captive colony - EW           | 0.0011            | 2211            | 965072      | 0.1149       |
| <i>C. maya</i> (n = 1)                  | captive colony - EW           | 0.0027            | 657             | 964452      | 0.2722       |
| <i>C. veronicae</i> (n = 1)             | captive colony - EW           | 0.0015            | 5160            | 1241190     | 0.1491       |

369

370

371

372

373 **Table S2.** Estimates of the pupfish mutation rate (median substitution rate per site per year) based  
374 on various modeling assumptions and datasets and their effect on the median divergence time for  
375 *diabolis*. The 95% credible intervals for each median substitution rate and the 95% confidence  
376 intervals for each *diabolis* divergence time estimate are indicated in brackets. Note that  
377 demographic estimates of divergence time from our *dadi* analysis scale linearly with mutation rate  
378 and we used the median substitution rate for each estimate. In our trimmed dataset, we also ran  
379 analyses after pruning two rogue taxa with minimal support in the tree (19 taxa: Fig. S4).

| dataset: taxa subset                      | filter (min. reads) | loci   | clock model            | median substitution rate (mutations/site/year) | <i>diabolis</i> divergence time (years) |
|-------------------------------------------|---------------------|--------|------------------------|------------------------------------------------|-----------------------------------------|
| original (21 taxa)                        | 8                   | 16,567 | uncorrelated lognormal | $5.37e^{-7}$ [ $4.01e^{-7}$ - $7.01e^{-7}$ ]   | 255 [ <b>105</b> -408]                  |
| original (21 taxa)                        | 20                  | 2,437  | uncorrelated lognormal | $2.06e^{-7}$ [ $1.64e^{-7}$ - $2.53e^{-7}$ ]   | 665 [541- <b>835</b> ]                  |
| 5 taxa:<br>Chichancanab+ <i>artifrons</i> | 8                   | 4,889  | uncorrelated lognormal | $5.69e^{-7}$ [ $5.47e^{-7}$ - $5.91e^{-7}$ ]   | 241 [232-250]                           |
| 5 taxa:<br>Chichancanab+ <i>artifrons</i> | 8                   | 4,889  | random local           | $3.14e^{-7}$ [ $2.86e^{-7}$ - $3.68e^{-7}$ ]   | 436 [372-479]                           |
| 5 taxa:<br>Chichancanab+ <i>artifrons</i> | 20                  | 2,437  | uncorrelated lognormal | $3.17e^{-7}$ [ $2.97e^{-7}$ - $3.37e^{-7}$ ]   | 431 [406-461]                           |
| 19 taxa: trimmed to first 53 bp           | 8                   | 4,159  | uncorrelated lognormal | $2.34e^{-7}$ [ $1.85e^{-7}$ - $2.93e^{-7}$ ]   | 585 [467-740]                           |
| 21 taxa: trimmed to first 53 bp           | 8                   | 4,159  | uncorrelated lognormal | $4.42e^{-7}$ [ $3.31e^{-7}$ - $5.98e^{-7}$ ]   | 310 [229-413]                           |

380

381

382

383

384

385



386 **Table S3.** Maximum likelihood parameter estimates in *dadi* for a simple demographic model of  
 387 the split between *mionectes* and *amargosae/shoshone/nevadensis* including a symmetric migration  
 388 rate, ancestral and derived effective population sizes. Based on 578,557 sites sequenced in at least  
 389 4 individuals per species. We used the median substitution rate from our original *Cyprinodon* time-  
 390 calibrated phylogeny of  $5.37e^{-7}$  per site per year and a generation time of 0.75 years.

|                                                               | <b>ML estimate</b>    | <b>95% confidence interval</b>              |
|---------------------------------------------------------------|-----------------------|---------------------------------------------|
| ancestral $N_e$                                               | 401.3                 | 369.9 – 429.4                               |
| <i>mionectes</i> and <i>amargosae</i> divergence time (years) | 209.9                 | 59.8 – 363.4                                |
| <i>amargosae</i> $N_e$ / ancestral $N_e$                      | 0.28                  | 0.22 – 0.36                                 |
| <i>mionectes</i> $N_e$ / ancestral $N_e$                      | 0.90                  | 0.70 – 1.15                                 |
| migration rate (per generation per year)                      | $9.28 \times 10^{-4}$ | $5.32 \times 10^{-5} - 1.46 \times 10^{-3}$ |

391

392

393

394

395

396

397

398

399

400

401

402

403

404

405 **Table S4.** D-statistics testing for introgression between *diabolis* and neighboring Death Valley  
406 and Ash Meadows pupfishes. *C. salinus* was used as an outgroup in all tests. Two-tailed *P*-values  
407 are reported for each *z*-score. Populations showing significant introgression with *diabolis* are  
408 bolded. Note that statistical tests are not independent of each other, but indicate the strength of  
409 support for introgression, or deviations from a tree-like model of population branching, across  
410 various four-taxon subsets.

| four-taxon tree                                    | D-statistic | ABBA sites | BABA sites | z-score | P-value |
|----------------------------------------------------|-------------|------------|------------|---------|---------|
| (a, <b>b</b> ) , ( <b>diabolis</b> , salinus)      | +           |            |            |         |         |
| (a, b) , ( <b>diabolis</b> , salinus)              | -           |            |            |         |         |
| <i>n. nevadensis</i> , <b><i>n. amargosae</i></b>  | 0.17 ± .05  | 148        | 104        | 3.39    | 0.0007  |
| <i>n. nevadensis</i> , <b><i>n. pectoralis</i></b> | 0.15 ± .05  | 148        | 110        | 3.11    | 0.002   |
| <b><i>n. amargosae</i></b> , <i>n. mionectes</i>   | -0.11 ± .05 | 121        | 151        | -2.18   | 0.029   |
| <i>n. nevadensis</i> , <i>n. shoshone</i>          | 0.09 ± .06  | 105        | 88         | 1.50    | 0.133   |
| <i>n. amargosae</i> , <i>n. shoshone</i>           | -0.07 ± .06 | 70         | 80         | -1.03   | 0.303   |
| <i>n. nevadensis</i> , <i>n. mionectes</i>         | 0.04 ± .05  | 133        | 122        | 0.84    | 0.399   |
| <i>n. amargosae</i> , <i>n. pectoralis</i>         | -0.00 ± .05 | 128        | 129        | -0.07   | 0.941   |

411

412

413

414

415

416

417

418

419 **Table S5.** Summary of STRUCTURE runs and statistics used for calculating Evanno's Delta K  
 420 [49].

| <b>k</b> | <b>reps</b> | <b>mean LnP(K)</b> | <b>stdev LnP(K)</b> | <b>Ln'(K)</b> | <b> Ln''(K) </b> | <b>ΔK</b> |
|----------|-------------|--------------------|---------------------|---------------|------------------|-----------|
| 1        | 2           | -71698.00          | 4.95                | —             | —                | —         |
| 2        | 8           | -64118.51          | 500.29              | 7579.49       | 868.16           | 1.74      |
| 3        | 8           | -55670.86          | 171.68              | 8447.65       | 6310.13          | 36.75     |
| 4        | 8           | -53533.34          | 221.07              | 2137.53       | 1159.91          | 5.25      |
| 5        | 8           | -50235.90          | 331.33              | 3297.44       | 1632.25          | 4.93      |
| 6        | 6           | -48570.72          | 1254.40             | 1665.18       | 1582.83          | 1.26      |
| 7        | 5           | -48488.36          | 1161.24             | 82.36         | 379.41           | 0.33      |
| 8        | 8           | -48785.41          | 1189.98             | -297.05       | 772.27           | 0.65      |
| 9        | 2           | -48310.20          | 74.95               | 475.21        | 1528.31          | 20.39     |
| 10       | 2           | -49363.30          | 1627.62             | -1053.10      | —                | —         |

421  
 422  
 423  
 424  
 425  
 426  
 427  
 428  
 429  
 430  
 431  
 432  
 433  
 434  
 435

436 **Appendix S1.** Species, location, source, collection date, and sample size per population for all  
 437 individuals genotyped at more than 5% of total loci and used for analyses (out of the total number  
 438 of individuals sequenced). Location numbers in parentheses from [1]. “EW” refers to extinct-in-  
 439 the-wild species which were sequenced from captive colonies.

| species                                 | <i>n</i><br>(>5%) | <i>n</i><br>total | location                        | source             | date          |
|-----------------------------------------|-------------------|-------------------|---------------------------------|--------------------|---------------|
| <i>Cyprinodon diabolis</i>              | 3                 | 13                | Devils Hole                     | Bailey<br>Gaines   | 2008-<br>2012 |
|                                         | 1                 | 3                 | School Spring Refuge            | Anthony<br>Echelle | 1989          |
|                                         | 2                 | 3                 | Point-of-Rocks Refuge           | LS                 | 2013          |
|                                         | 0                 | 3                 | Mandalay Bay Refuge             | LS                 | 2013          |
| <i>Cyprinodon nevadensis amargosae</i>  | 7                 | 8                 | Amargosa R. (5)                 | BJT                | 1994          |
|                                         | 0                 | 3                 | Amargosa R., Tecopa (7)         | BJT                | 1994          |
|                                         | 0                 | 3                 | Tecopa Spring Rd. (8)           | BJT                | 1994          |
|                                         | 0                 | 3                 | China Ranch (6)                 | BJT                | 1994          |
| <i>Cyprinodon nevadensis mionectes</i>  | 1                 | 6                 | Big Spring                      | BJT                | 1994          |
|                                         | 8                 | 10                | Point-of-Rocks                  | BJT                | 1994          |
| <i>Cyprinodon nevadensis nevadensis</i> | 7                 | 9                 | Saratoga Spring                 | BJT                | 1994          |
| <i>Cyprinodon nevadensis pectoralis</i> | 7                 | 9                 | Indian Spring                   | Anthony<br>Echelle | 1989          |
|                                         | 1                 | 5                 | School Spring                   | BJT                | 1994          |
| <i>Cyprinodon nevadensis shoshone</i>   | 1                 | 3                 | Amargosa R., Shoshone<br>(11)   | BJT                | 1994          |
|                                         | 5                 | 7                 | Shoshone Head Spring<br>(10)    | BJT                | 1994          |
| <i>Cyprinodon salinus salinus</i>       | 2                 | 4                 | Salt Creek                      | BJT                | 1994          |
| <i>Cyprinodon salinus milleri</i>       | 1                 | 3                 | Cottonball Marsh                | BJT                | 1994          |
| <i>Cyprinodon eremus</i>                | 0                 | 2                 | Quitobaquito Spring,<br>Arizona |                    | 1994          |
| <i>Cyprinodon fontinalis</i> (EW)       | 0                 | 1                 | Apache Spring                   | John Brill         | captive       |
| (EW)                                    | 0                 | 2                 | Carbonera Spring                | Al<br>Morales      | captive       |
| <i>Cyprinodon macularius</i>            | 0                 | 2                 | Coachella                       | BJT                | 1994          |
| <i>Cyprinodon radiosus</i>              | 0                 | 2                 | White Mountain                  | BJT                | 1994          |
| <i>Cyprinodon artifrons</i>             | 1                 |                   | Cancun, Mexico                  | Al<br>Morales      | 2011          |
| <i>Cyprinodon labiosus</i>              | 1                 |                   | Laguna Chichancanab,<br>Mexico  | Al<br>Morales      | 2011          |
| <i>Cyprinodon beltrani</i>              | 1                 |                   | Laguna Chichancanab,<br>Mexico  | Al<br>Morales      | 2011          |

|                                   |   |                                      |                      |         |
|-----------------------------------|---|--------------------------------------|----------------------|---------|
| <i>Cyprinodon verecundus (EW)</i> | 1 | Laguna Chichancanab,<br>Mexico       | Michael<br>Schneider | captive |
| <i>Cyprinodon maya (EW)</i>       | 1 | Laguna Chichancanab,<br>Mexico       | Rhiannon<br>West     | captive |
| <i>Cyprinodon variegatus</i>      | 1 | San Salvador Island,<br>Bahamas      | CHM                  | 2008    |
| <i>Cyprinodon nichollsi</i>       | 1 | Laguna Oviedo,<br>Dominican Republic | CHM                  | 2011    |
| <i>Cyprinodon alvarezii (EW)</i>  | 1 | El Potosi, Mexico                    | Ryan<br>Grisso       | captive |
| <i>Cyprinodon veronicae (EW)</i>  | 1 | Charco Palma, Mexico                 | Arcadio<br>Valdes    | captive |
| <i>Cyprinodon albivelis</i>       | 1 | Rio Yaqui, Mexico                    | Gonzalez<br>BJT      | 1994    |

---

440

441

442

443

444

445

446

447

448

449

450

451

452

453

454 **Fig. S1**

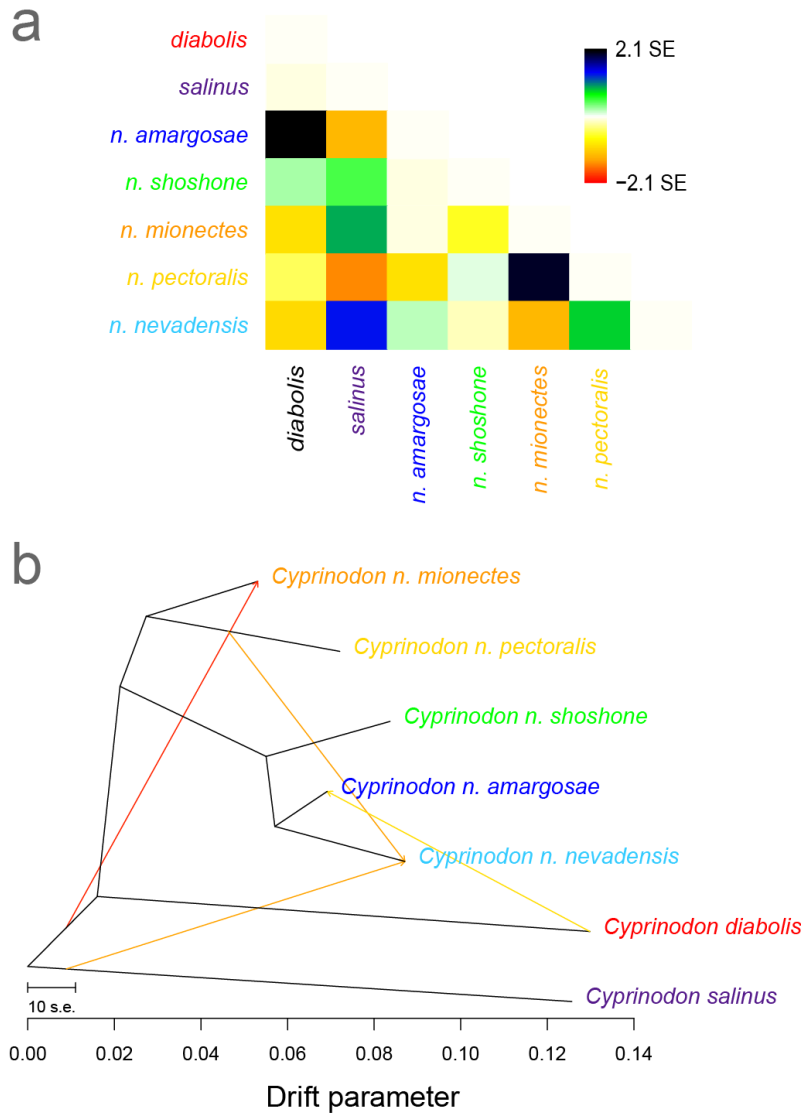

455

456 **Fig. S1.** a) Genetic variance-covariance structure of allele frequencies among Death Valley  
457 pupfish populations. b) Treemix graph with four migration events depicting major gene flow  
458 among Death Valley pupfish populations. Note the recent gene flow from *diabolis* into *amargosae*,  
459 consistent with Table S2 and Fig. 2c. Species colored as in Figs. 1-2. Heat color of migration lines  
460 indicate strength of admixture.

461

462

463 **Fig. S2**

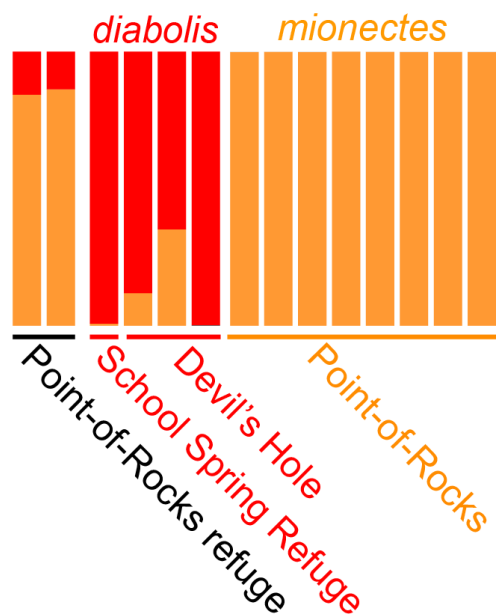

464  
465 **Fig. S2** Bayesian clustering analyses using STRUCTURE with  $k = 2$  groups indicating the  
466 proportion of shared ancestry among *diabolis*, *mionectes*, and the Point-of-Rocks *diabolis* refuge  
467 population currently housed at the Ash Meadows Fish Conservation Facility. The Point-of-Rocks  
468 *diabolis* refuge population contained substantial shared ancestry with *mionectes* after less than 11  
469 years [50].

470  
471  
472  
473  
474  
475  
476  
477  
478

479 **Fig. S3**

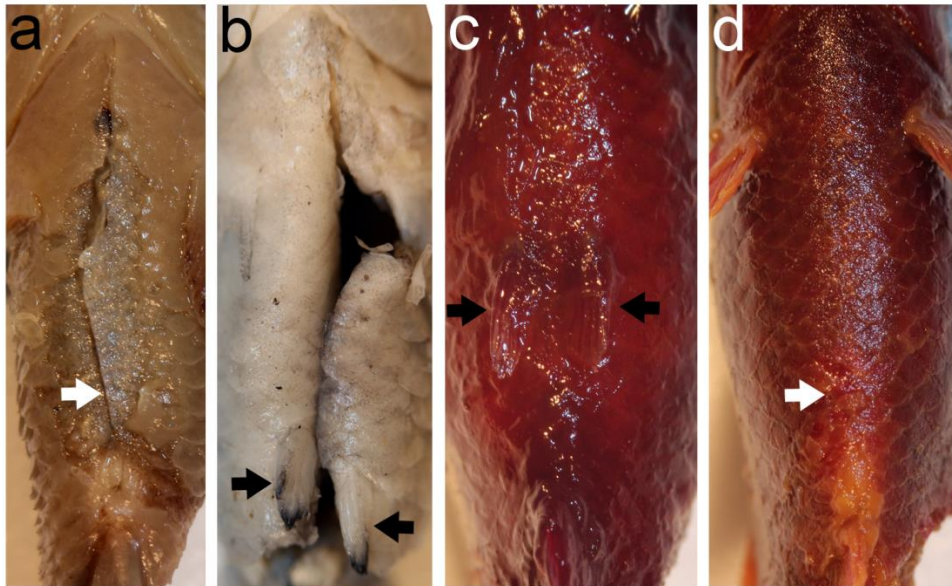

480

481 **Fig. S3** Representative photographs in ventral view showing presence (black arrows) or absence  
482 (white arrow) of pelvic fins in a) wild *C. diabolis* (32° C), b) wild *C. nevadensis mionectes* (28-  
483 29°C), c-d) *diabolis x mionectes* hybrids reared over five generations at 28-29°C (alizarin-stained).  
484 Laboratory-rearing experiments indicate that pelvic fin loss in *diabolis* has a genetic basis. First,  
485 100% of wild-collected *diabolis* eggs raised in the lab at 28-29°C lacked pelvic fins (O.  
486 Feuerbacher pers. comm.), whereas 25% of *pectoralis* and 10.5% of *mionectes* found at similar  
487 temperatures in the wild lacked pelvic fins ( $n = 47$ ; B. Turner unpublished data). Second, pelvic  
488 fin loss continues to segregate over several generations within a laboratory-reared *diabolis x*  
489 *mionectes* hybrid population (c-d).

490

491

492

493

494



495

496 **Fig. S4**

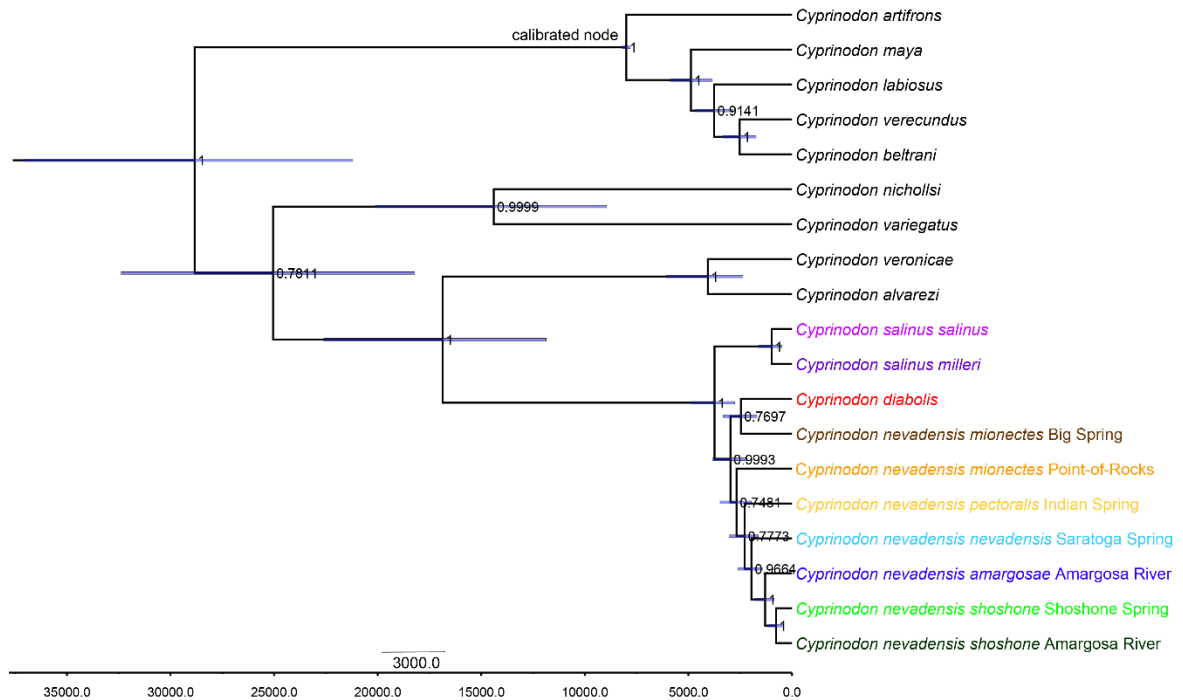

497

498 **Fig. S4** Time-calibrated maximum clade credibility tree for the Death Valley populations plus  
499 outgroup taxa across *Cyprinodon* estimated from the trimmed dataset of 4,159 concatenated 53-  
500 bp loci present in at least half of all taxa. Trees were estimated using BEAST under a coalescent  
501 model with GTR +  $\Gamma$  nucleotide substitution rates as described for Fig. 2. Two 'rogue' taxa with  
502 minimal support were trimmed for this analysis (*C. albivelis* and *C. nevadensis pectoralis* School  
503 Spring). Posterior probability of each node is indicated. Blue bars indicate 95% credible intervals  
504 for the estimated age of each node.

505

506

507

508

509

510 **Fig. S5**

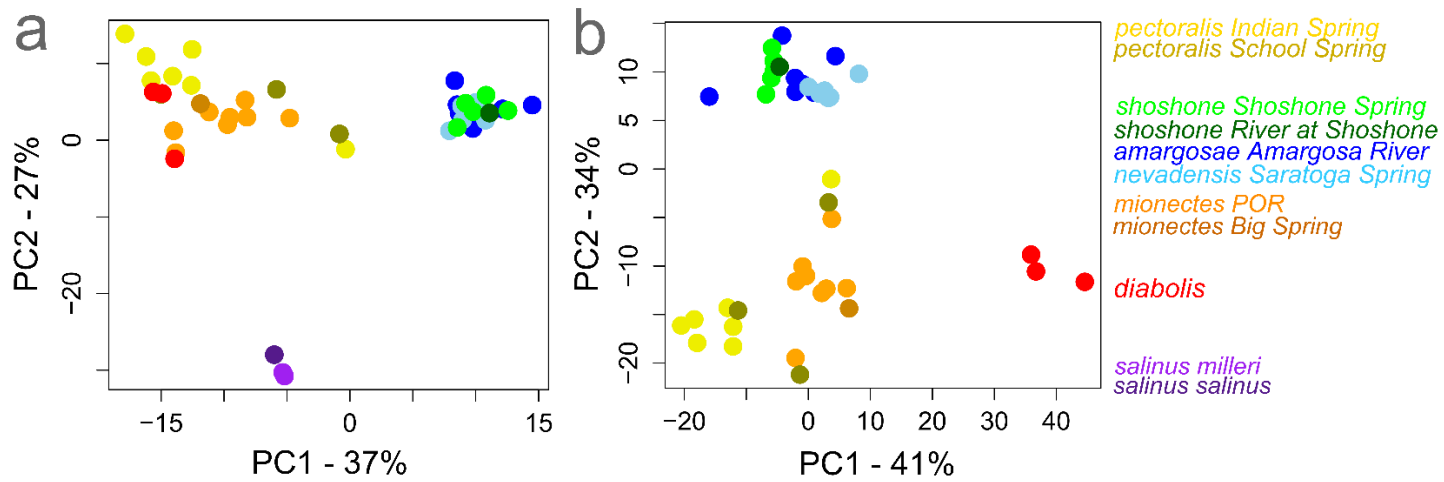

511

512 **Fig. S5** First two principal components of genetic variance for 1,051 SNPs on 3,484 loci from the

513 trimmed 53-bp dataset showing a) three main clusters of Death Valley populations as in Fig. 2. b)

514 Excluding the distant *salinus salinus* and *salinus milleri* populations reveals four distinct genetic

515 clusters. SNPs were filtered to one per locus to reduce the effects of linkage disequilibrium.
